# Supplementary material for: Reduction of aromatic and aliphatic nitro groups to anilines and amines with hypophosphites associated with Pd/C
Source: Royal Society of Chemistry journal article supplement (doi:10.1039/c3gc37024k), 2013-01-01

Supplementary Material (ESI) for Green Chemistry

## **Reduction of aromatic and aliphatic nitro to amine and amine with hypophosphites associated with Pd/C.**

Marc Baron,<sup>a</sup> Estelle Méta y,<sup>\*a</sup> Marc Lemaire,<sup>a</sup> and Florence Popowycz<sup>\*b</sup>

<sup>a</sup> *Laboratoire de Catalyse et Synthèse et Environnement, Institut de Chimie et Biochimie Moléculaires et Supramoléculaires (ICBMS), CNRS, UMR5246, Université Lyon 1, 43 Boulevard du 11 Novembre 1918, Bat CPE, 69622 Villeurbanne, France. Fax+33(0)-472-43-14-08 ; Tel :+33(0)-472-44-85-07 ; E-mail : estelle.metay@univ-lyon1.fr*

<sup>b</sup> *Equipe Chimie Organique et Bioorganique, Institut de Chimie et Biochimie Moléculaires et Supramoléculaires (ICBMS), Institut National des Sciences Appliquées de Lyon (INSA Lyon), Bâtiment Jules Verne, 20 Avenue Albert Einstein, 69621 Villeurbanne Cedex, France. Fax: +33(0)-472-43-88-96;Tel :+33(0)-472-43-82-21; E-mail: florence.popowycz@insa-lyon.fr*

### **Table of Contents**

|                                                          |          |
|----------------------------------------------------------|----------|
| <b>NMR <sup>1</sup>H and <sup>13</sup>C Spectra.....</b> | <b>2</b> |
|----------------------------------------------------------|----------|

### 3-(1-Methyl-2-nitro-ethyl)-1H-indole (1)

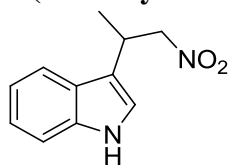

300 MHz, CDCl<sub>3</sub>

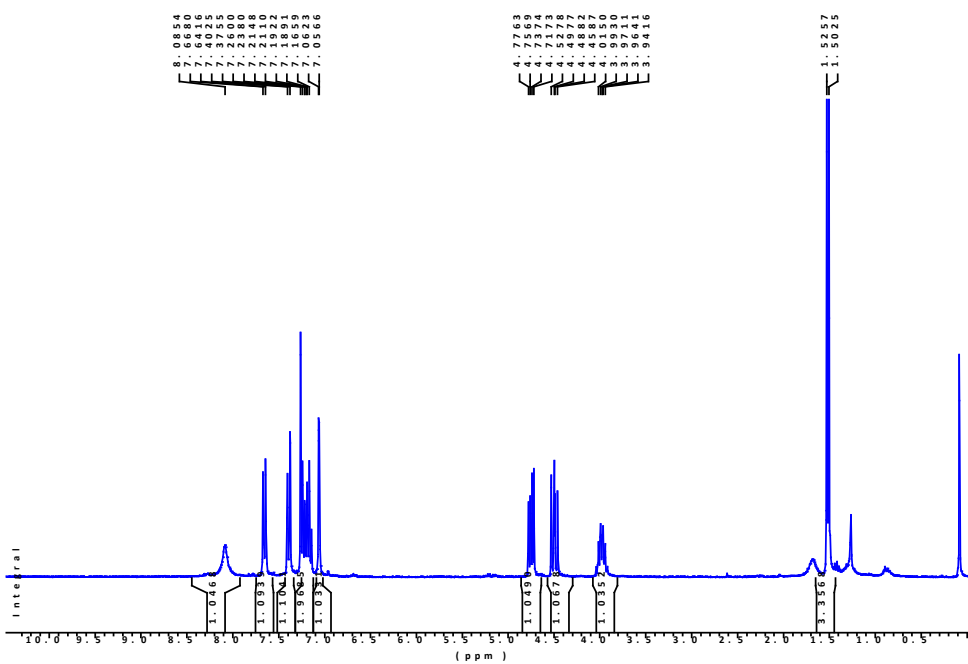

75 MHz, CDCl<sub>3</sub>

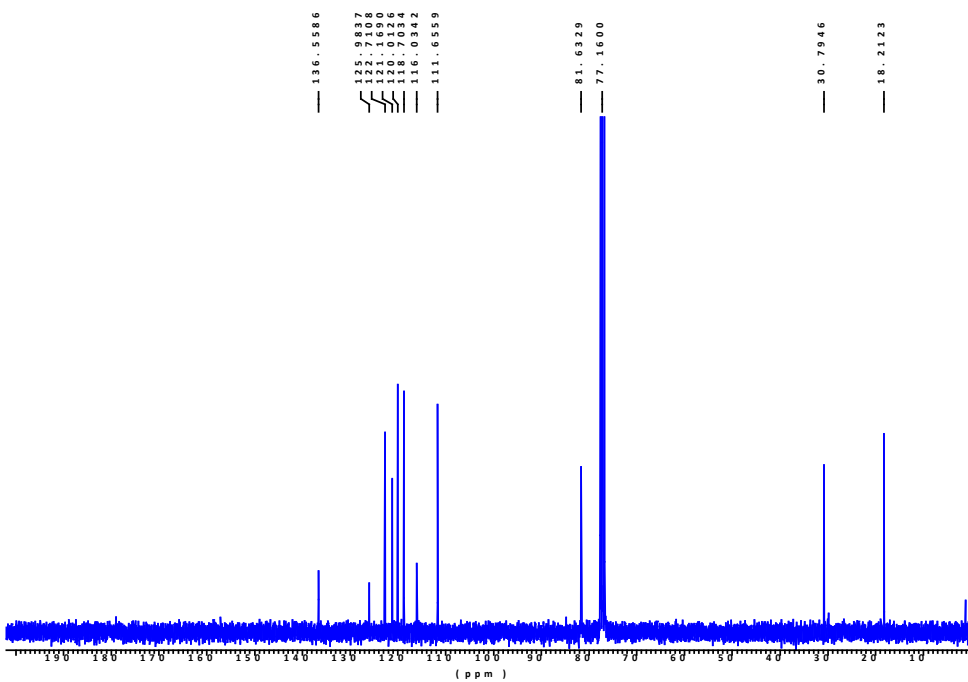



### 1-Nonylamine hydrochloride (3)

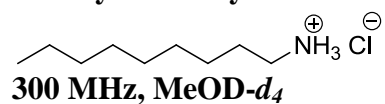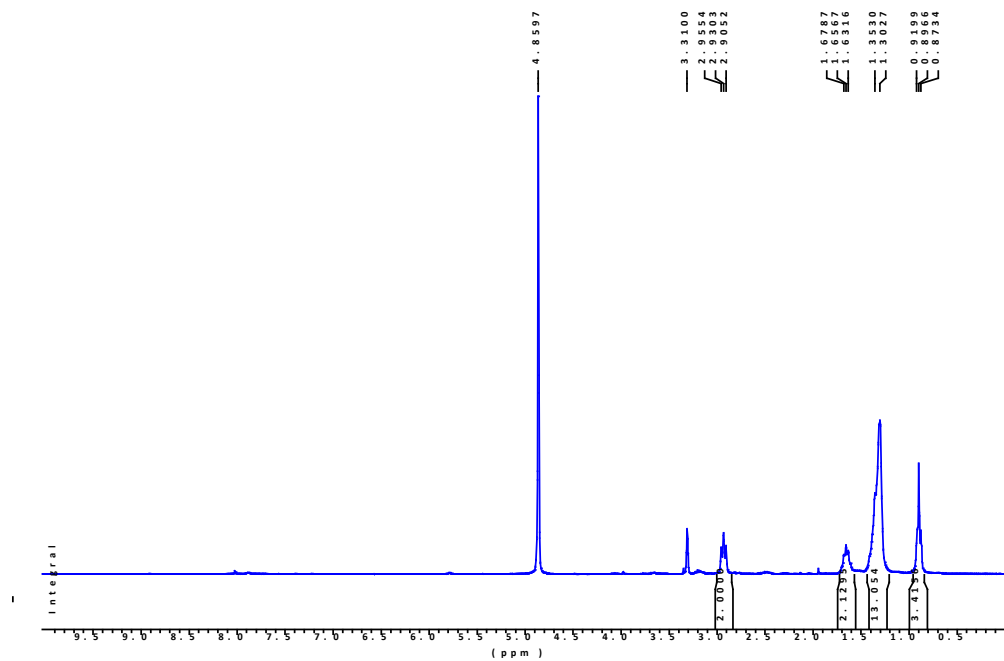

### 75 MHz, MeOD-*d*<sub>4</sub>

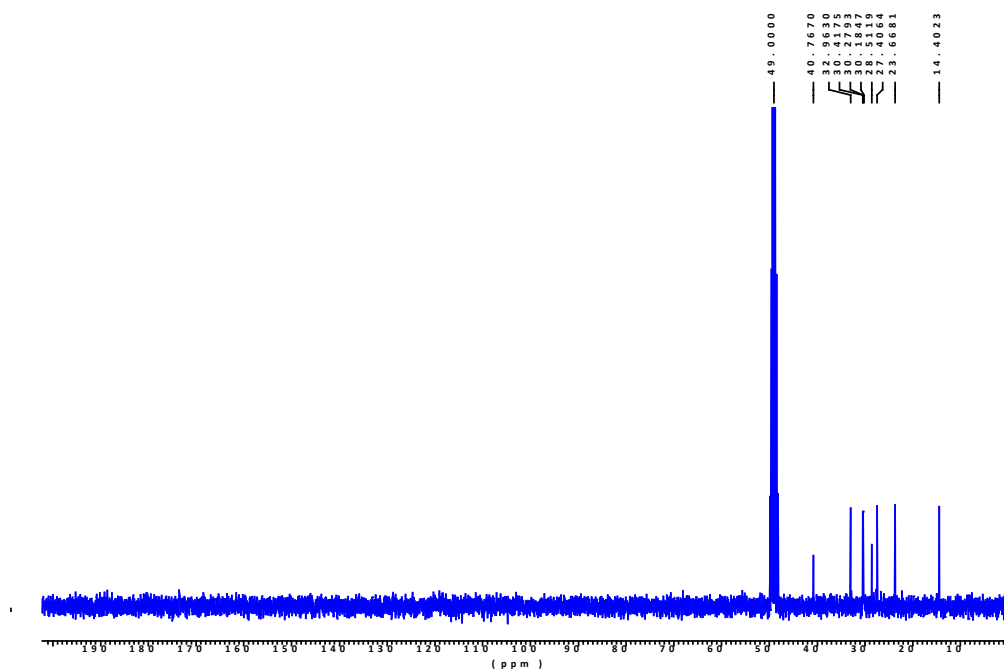

### 2-(3-Aminopropyl)isoindoline-1,3-dione (4)

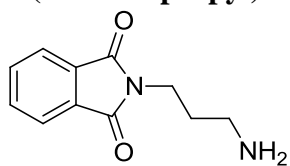

400 MHz, CD<sub>2</sub>Cl<sub>2</sub>

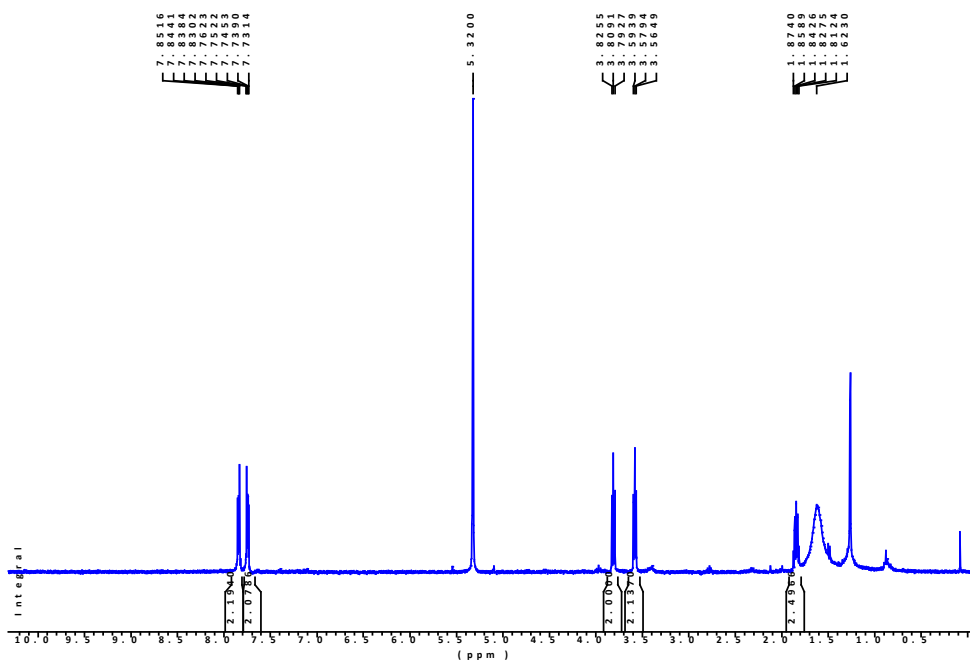

125 MHz, CDCl<sub>3</sub>

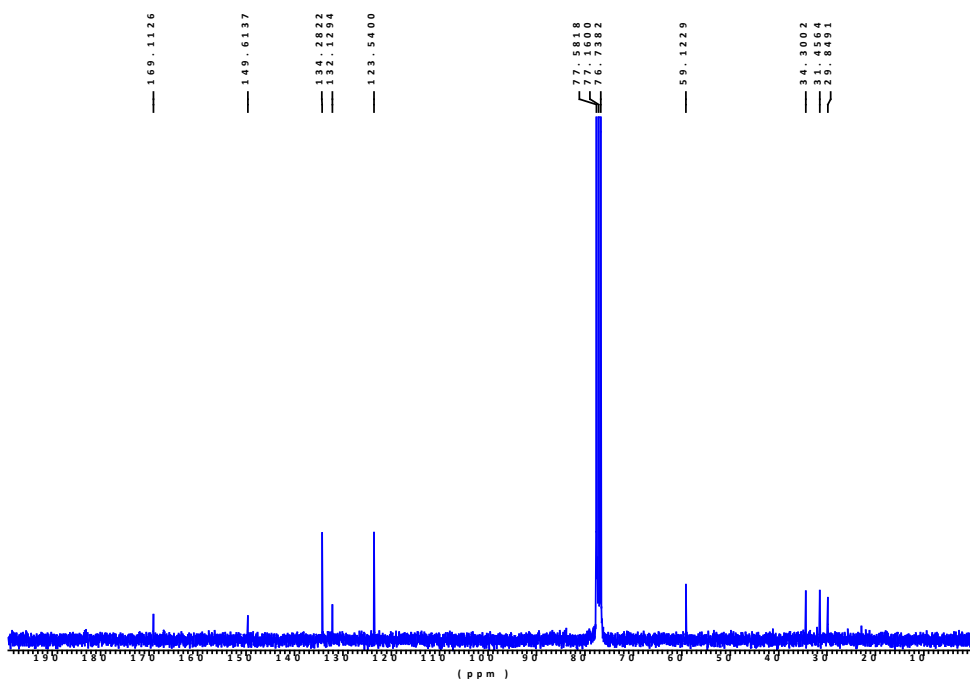

### Tryptamine [61-54-1] (5)

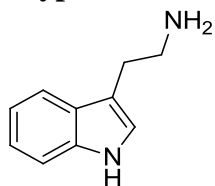

300 MHz, DMSO-*d*<sub>6</sub>

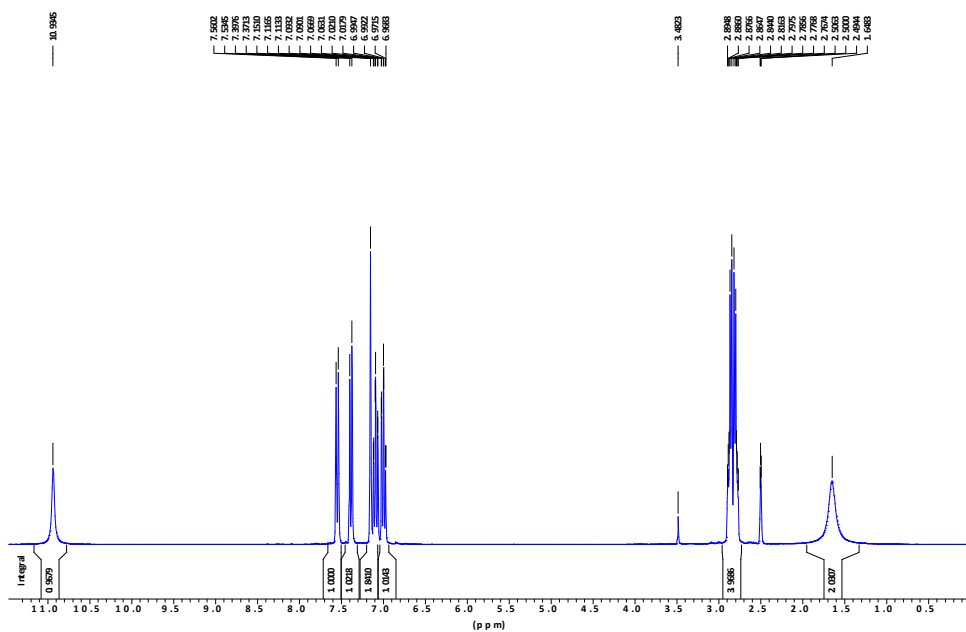

75 MHz, DMSO-*d*<sub>6</sub>

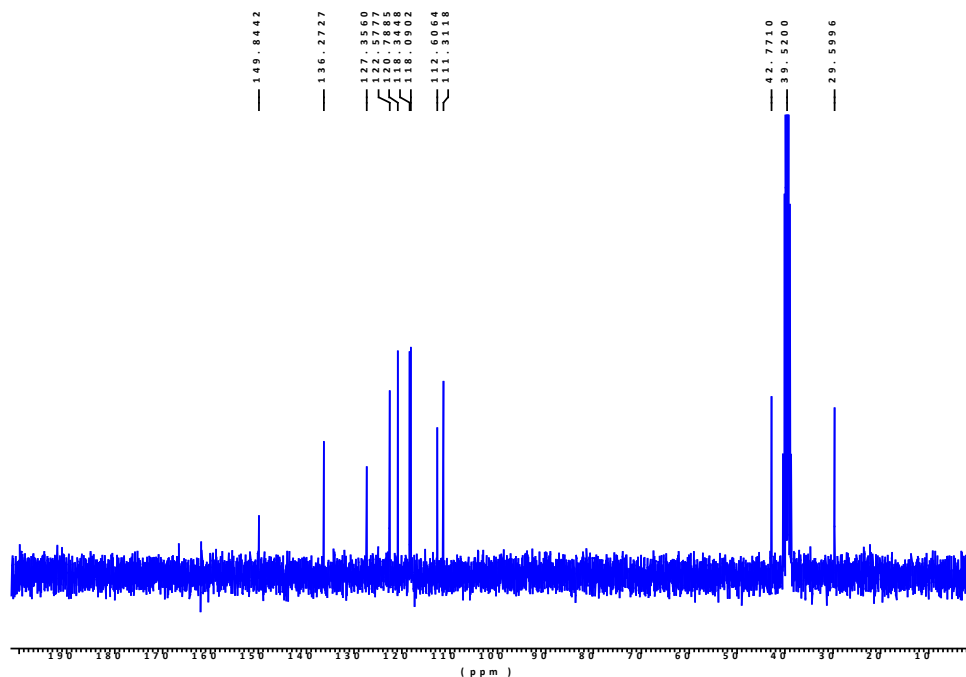

### 2,2-Di(1*H*-indol-3-yl)ethanamine (6)

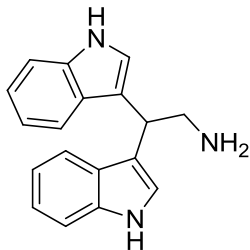

300 MHz, MeOD-*d*<sub>4</sub>

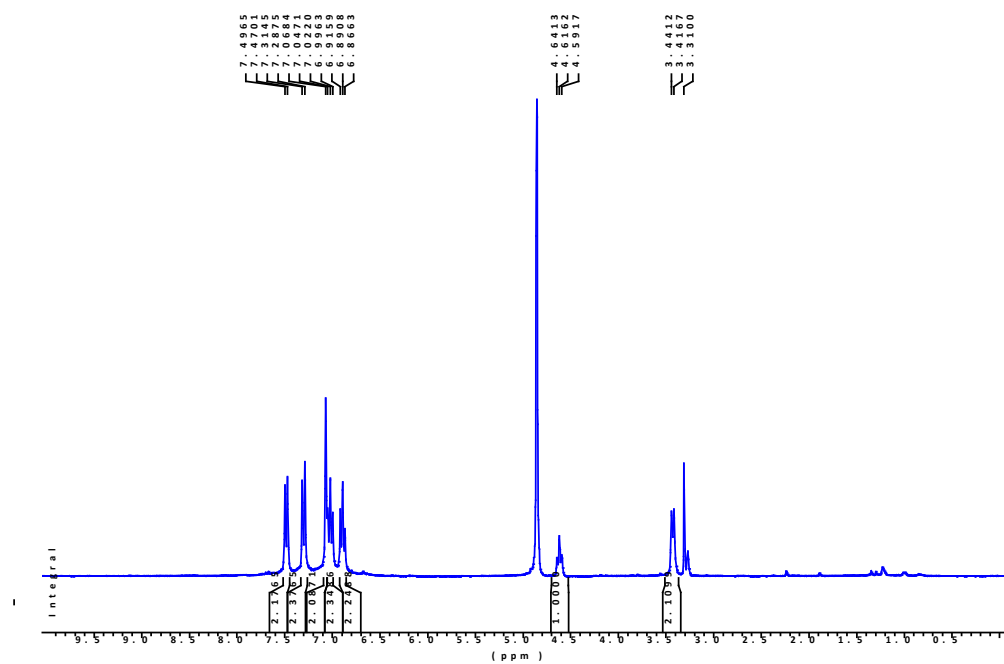

75 MHz, MeOD-*d*<sub>4</sub>

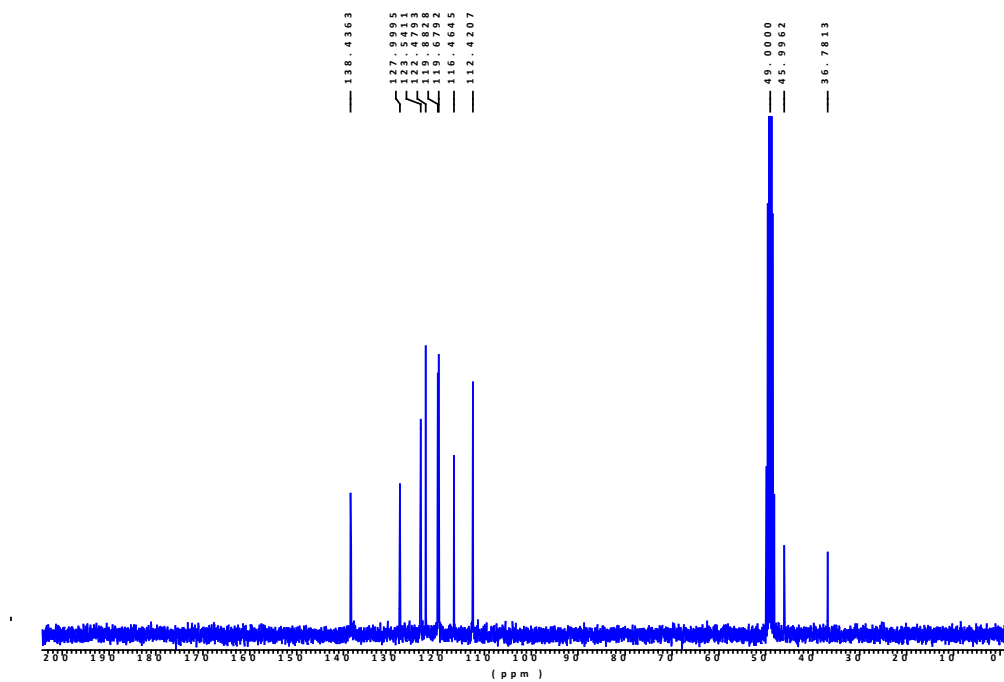

## 2-(1*H*-Indol-3-yl)-2-phenyl-ethylamine (7)

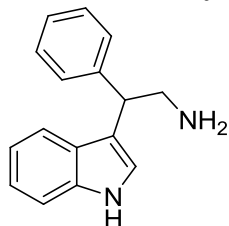

400 MHz, DMSO-*d*<sub>6</sub>

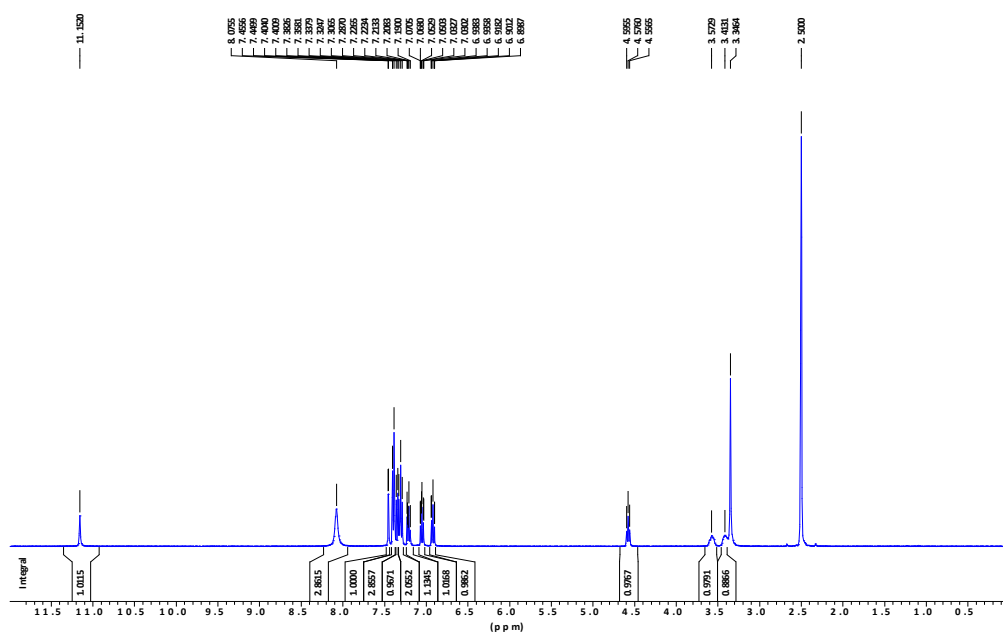

100 MHz, DMSO-*d*<sub>6</sub>

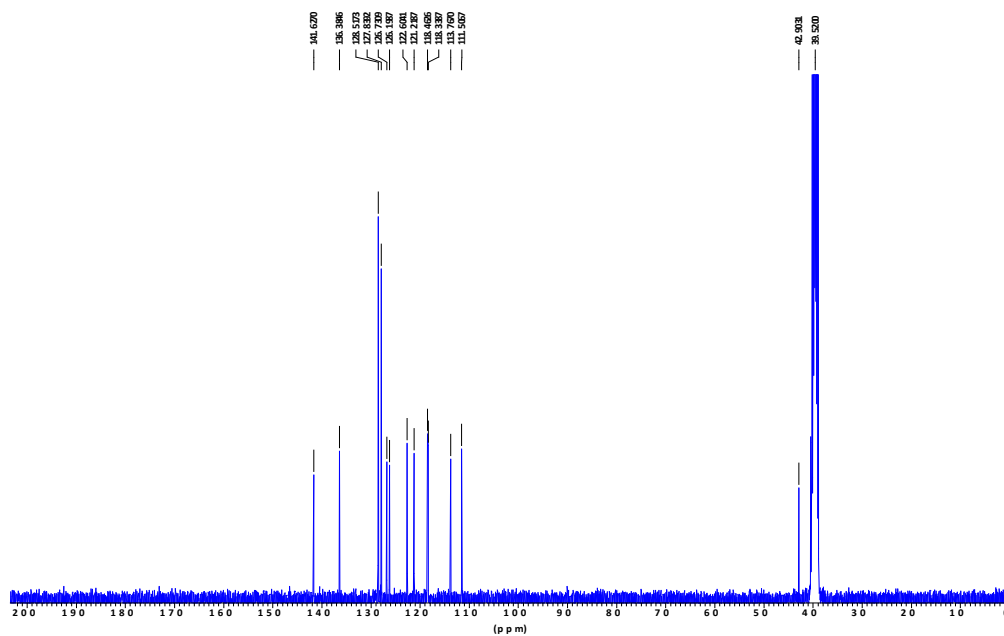



### 3-(2-Amino-1-[1-(1*H*-indol-3-yl)ethyl]-4-hydroxy-2*H*-chromen-2-one (8)

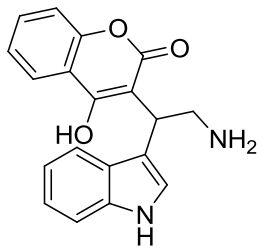

400 MHz, MeOD-*d*<sub>4</sub>

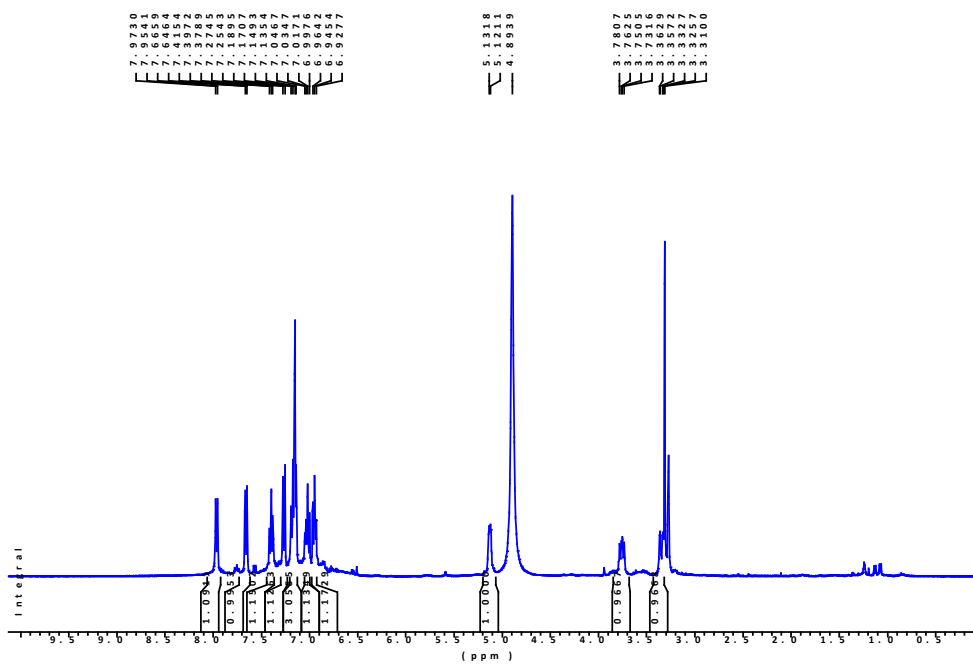

100 MHz, MeOD-*d*<sub>4</sub>

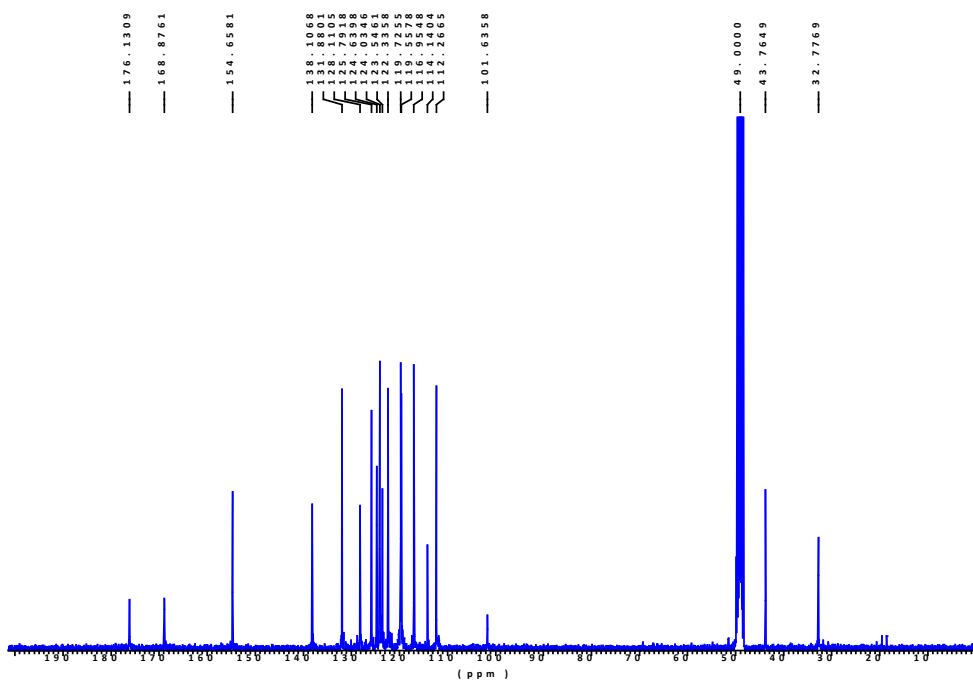

### Methyl 4-(1*H*-indol-3-yl)-2-oxopyrrolidine-3-carboxylate (9)

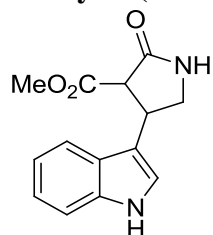

400 MHz, DMSO-*d*<sub>6</sub>

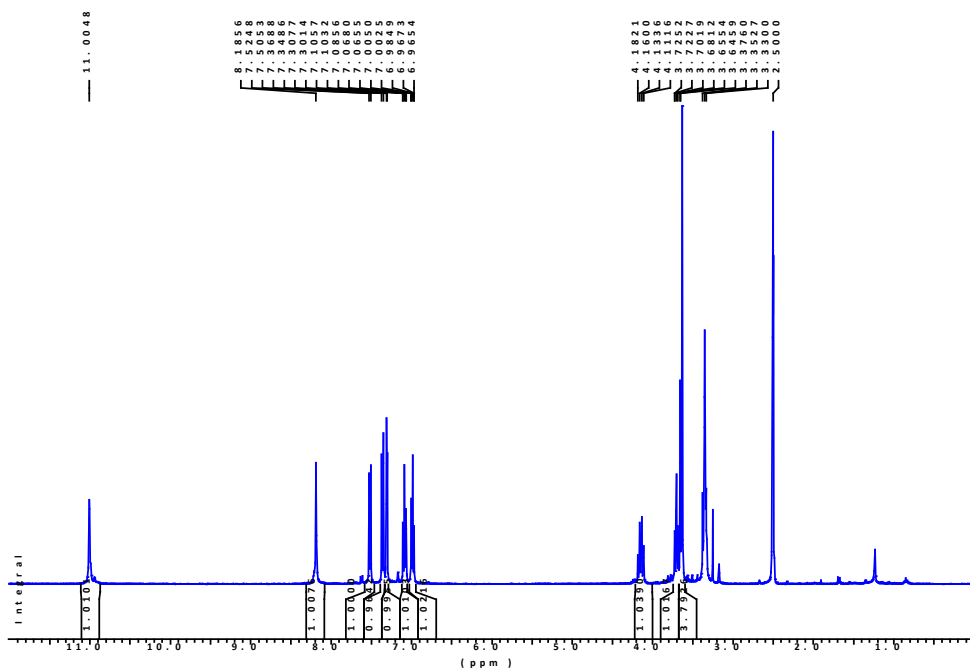

100 MHz, DMSO-*d*<sub>6</sub>

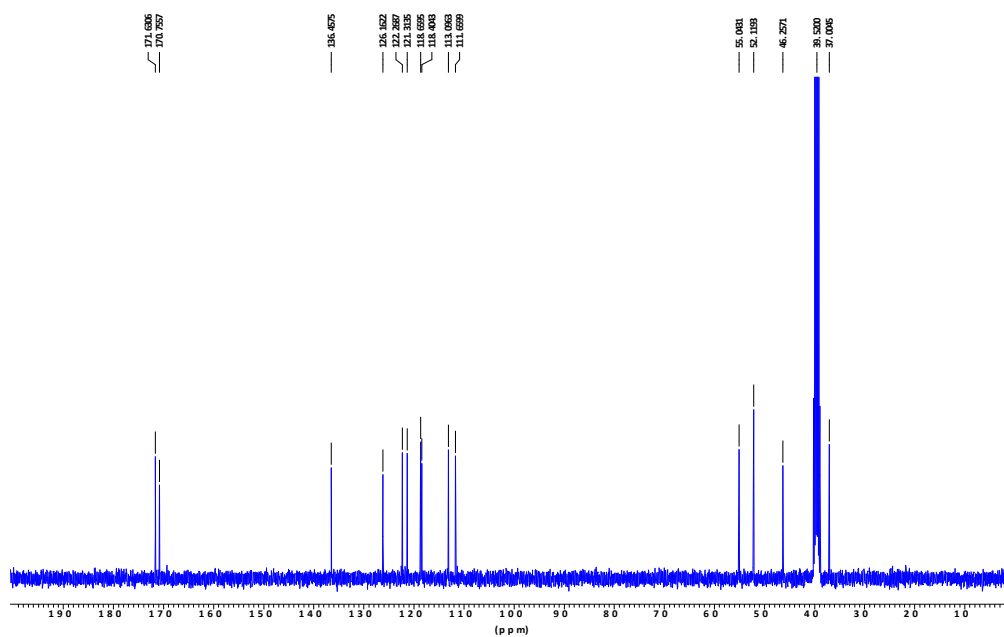

### Methyl 4-(1*H*-indol-3-yl)-3-methoxy-2-oxopyrrolidine-3-carboxylate (10)

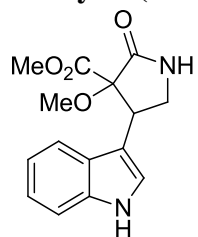

300 MHz, DMSO-*d*<sub>6</sub>

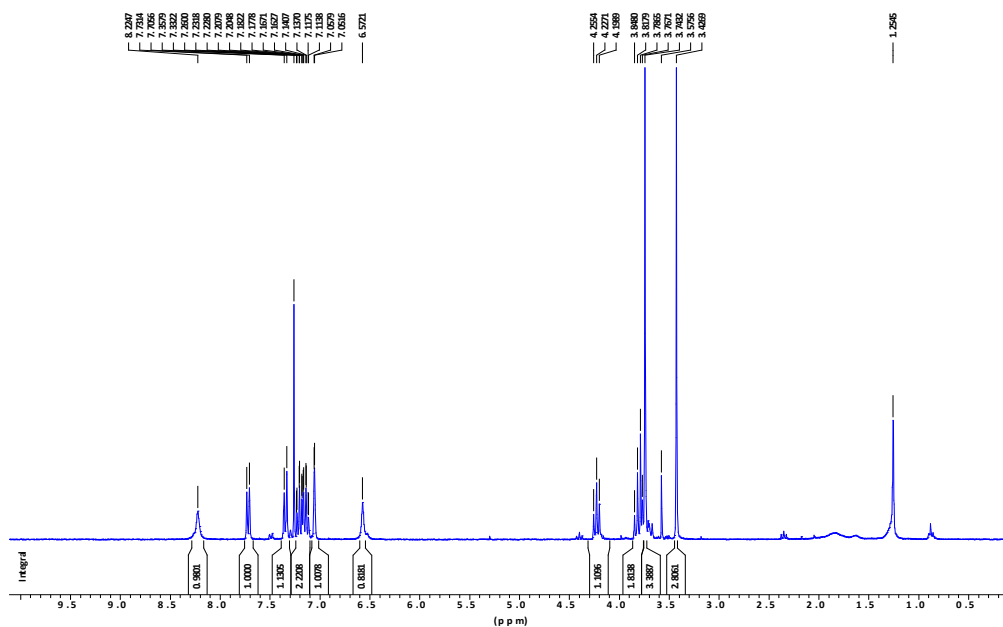

75 MHz, DMSO-*d*<sub>6</sub>

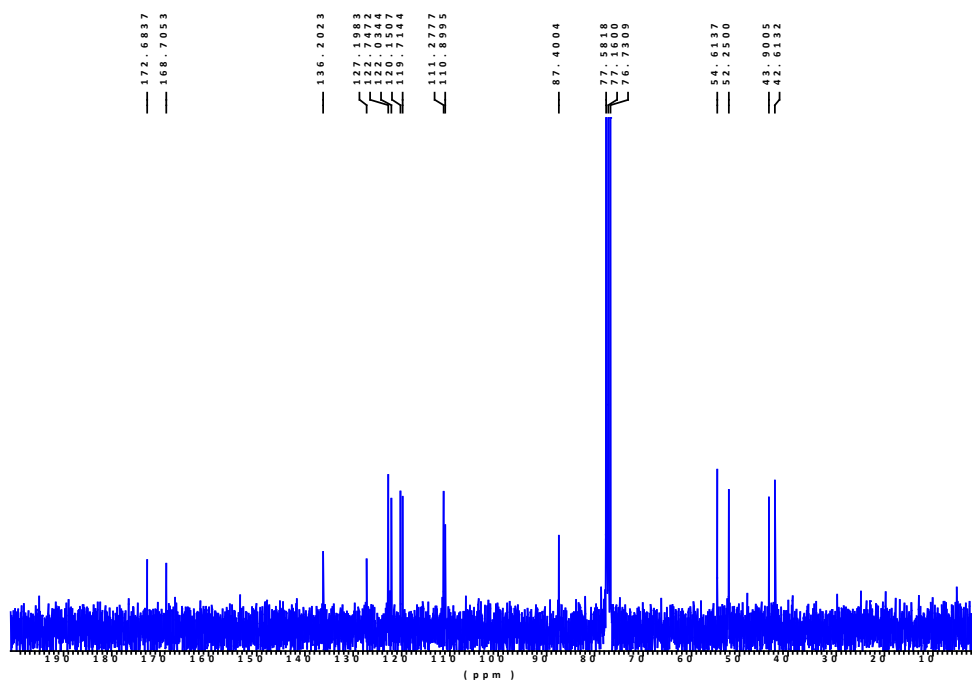



### Aniline [62-53-3] (12)

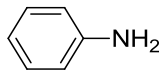

300 MHz, CDCl<sub>3</sub>

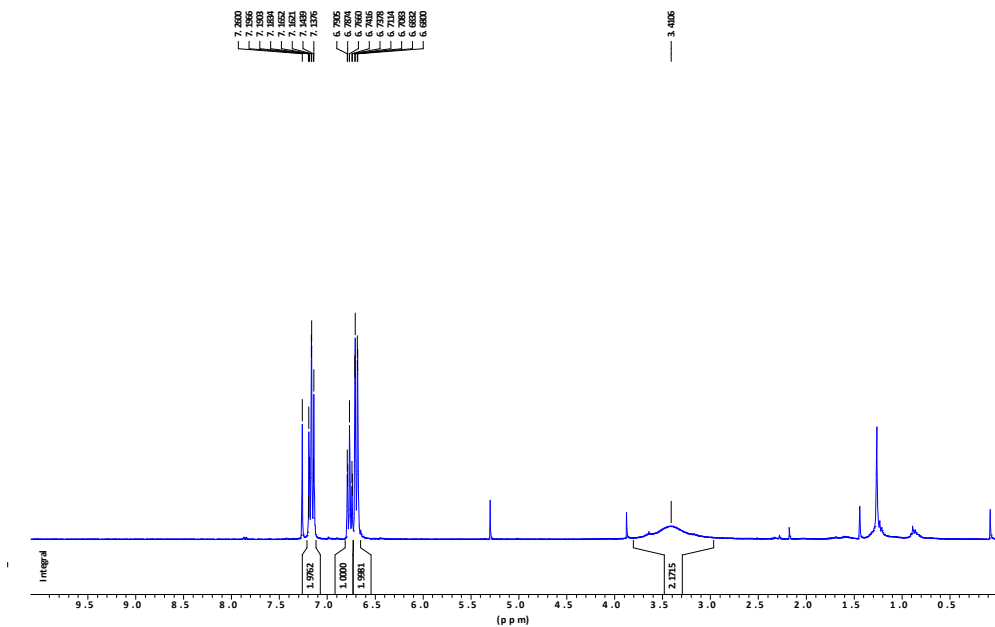

75 MHz, CDCl<sub>3</sub>

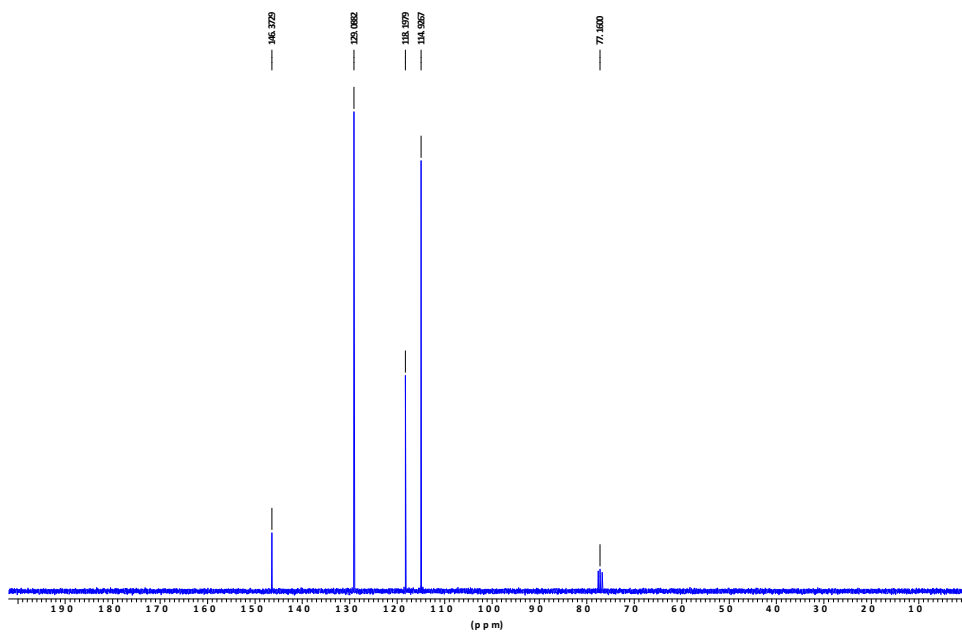

### 1,4-Phenylenediamine [106-50-3] (13)

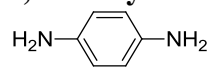

300 MHz, CDCl<sub>3</sub>

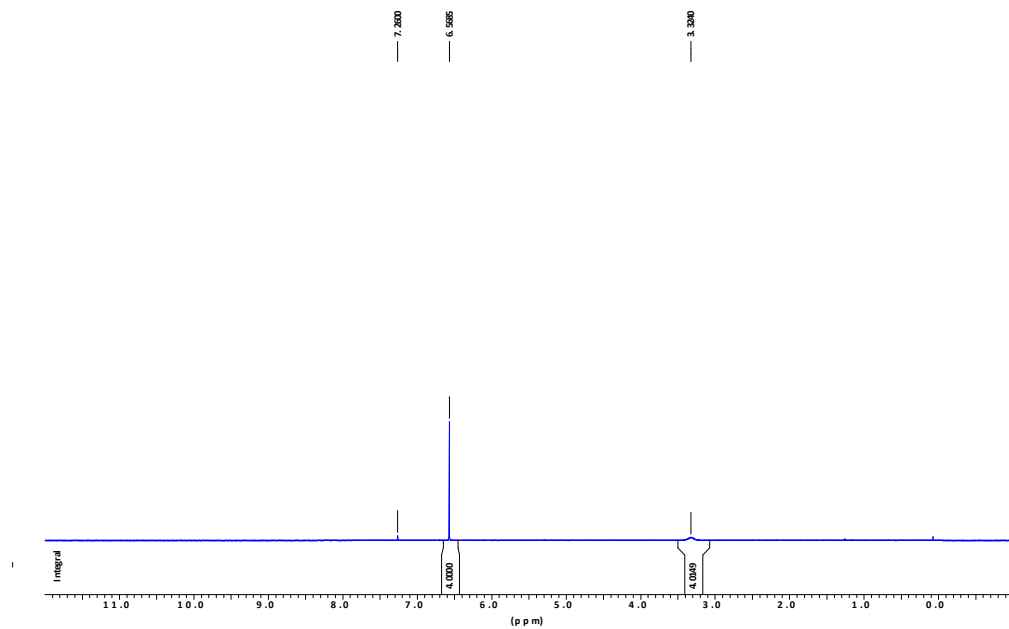

75 MHz, CDCl<sub>3</sub>

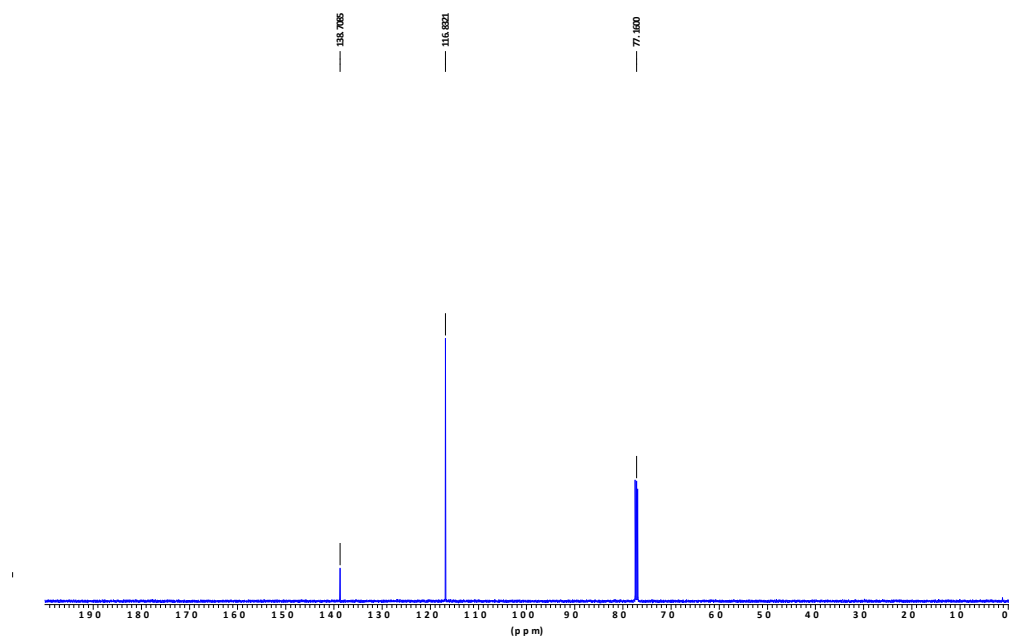

### 4-Aminobenzonitrile [873-74-5] (14)

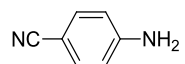

300 MHz, CDCl<sub>3</sub>

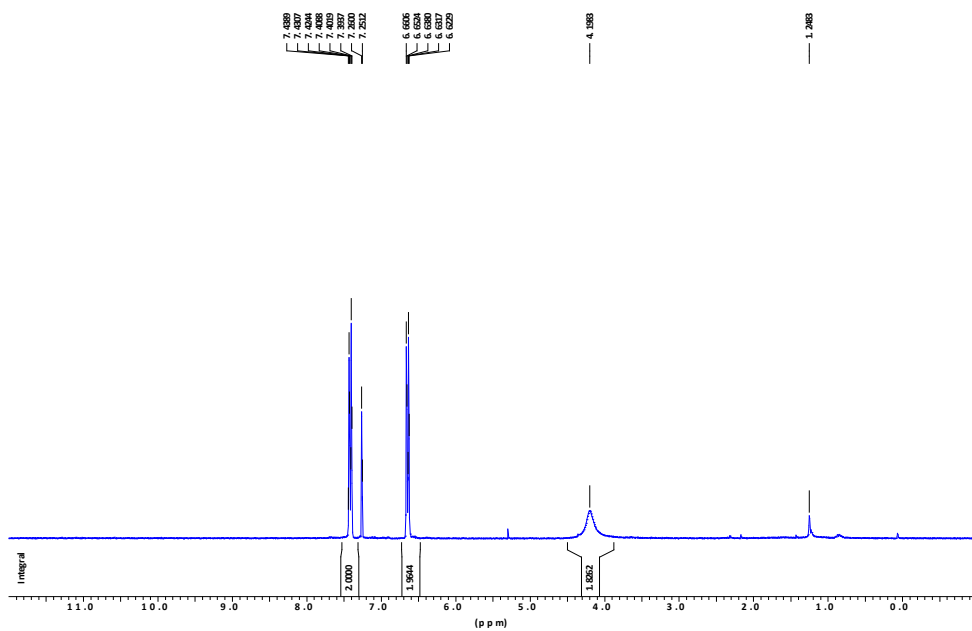

75 MHz, CDCl<sub>3</sub>

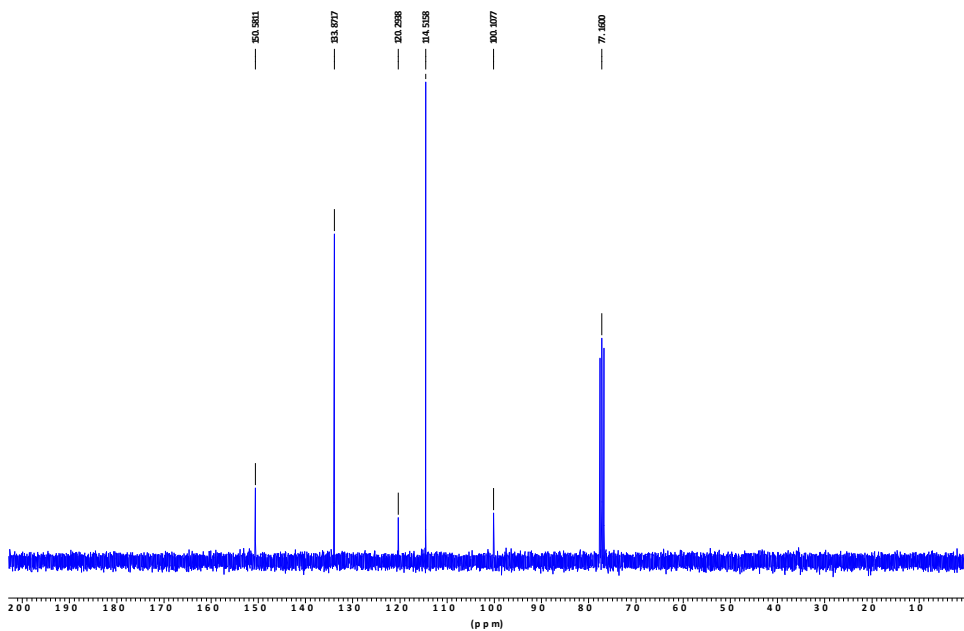

### 4-Aminobenzoic acid [150-13-0] (15)

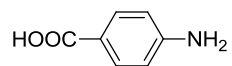

300 MHz, DMSO-*d*<sub>6</sub>

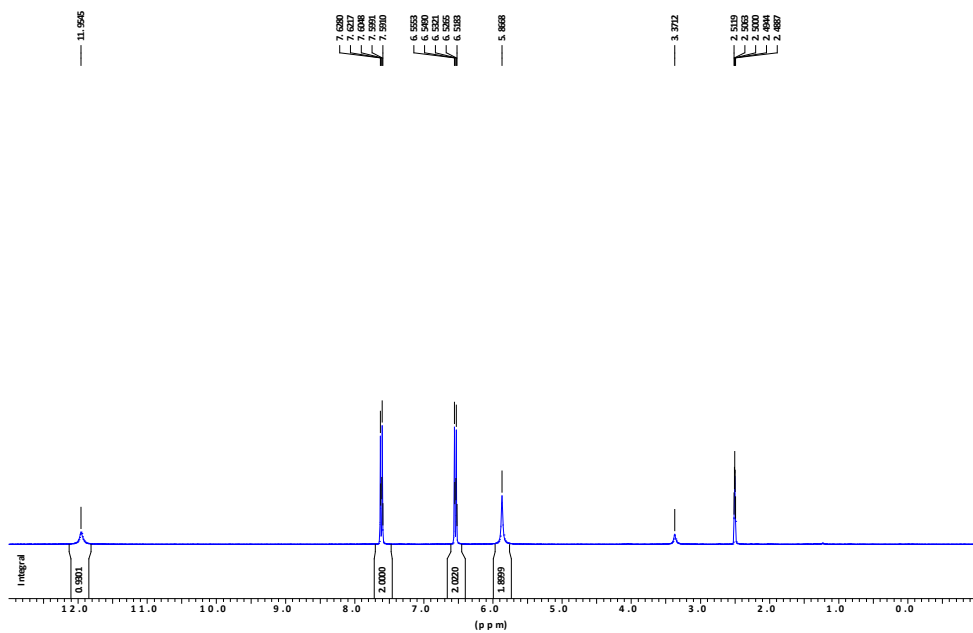

75 MHz, DMSO-*d*<sub>6</sub>

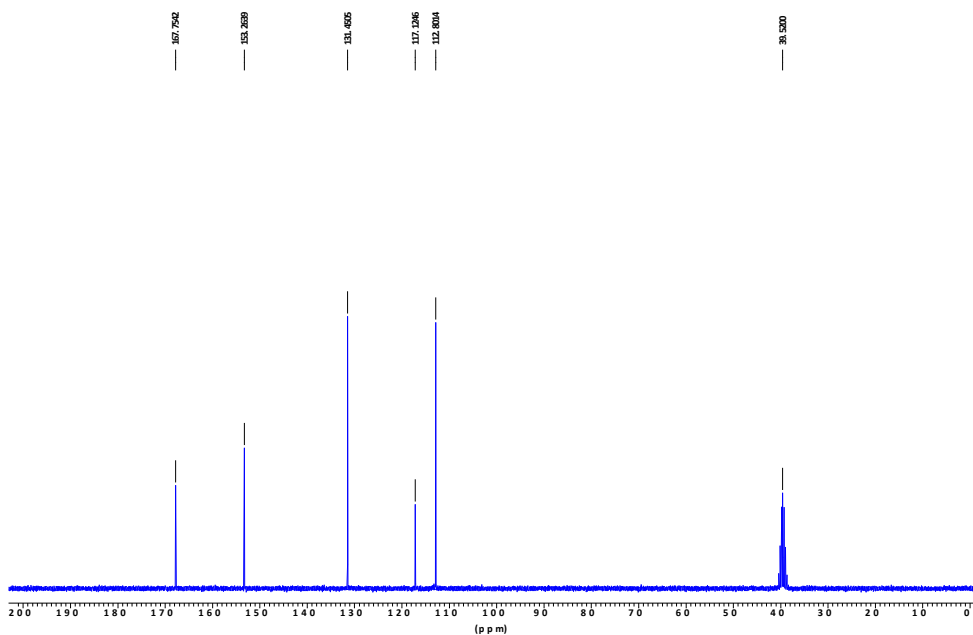



### 4-Amino acetophenone [99-92-3] (16)

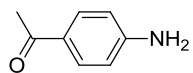

300 MHz, CDCl<sub>3</sub>

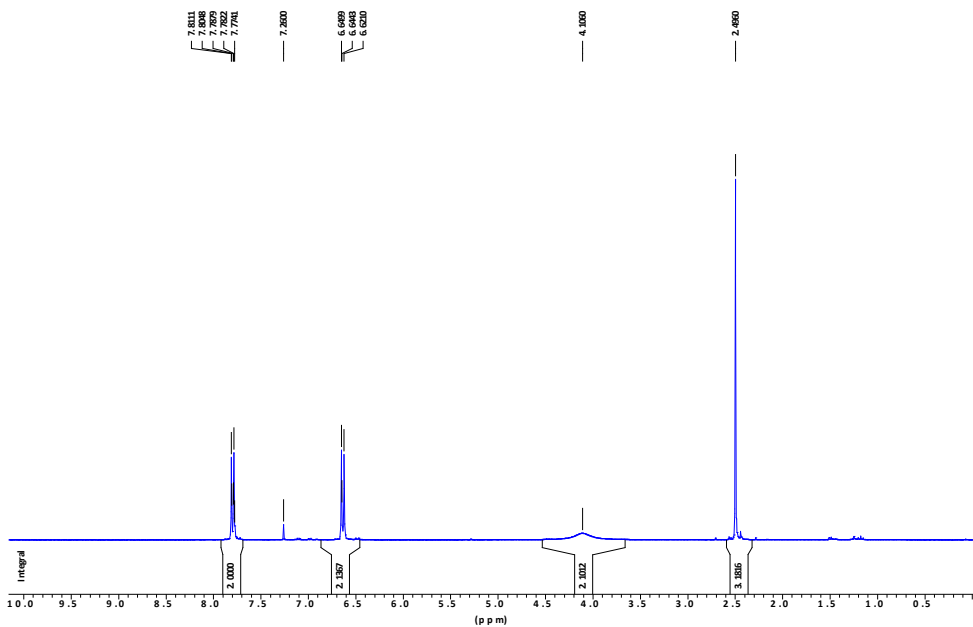

75 MHz, CDCl<sub>3</sub>

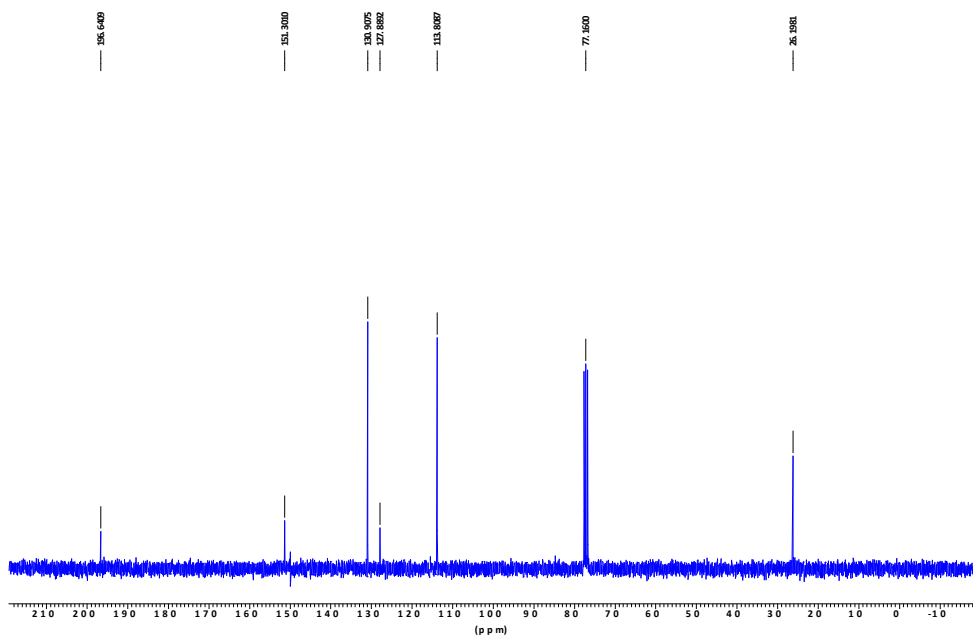

### Methyl 4-aminobenzoate [18469-52-8] (17)

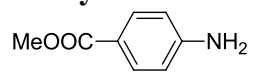

400 MHz, CDCl<sub>3</sub>

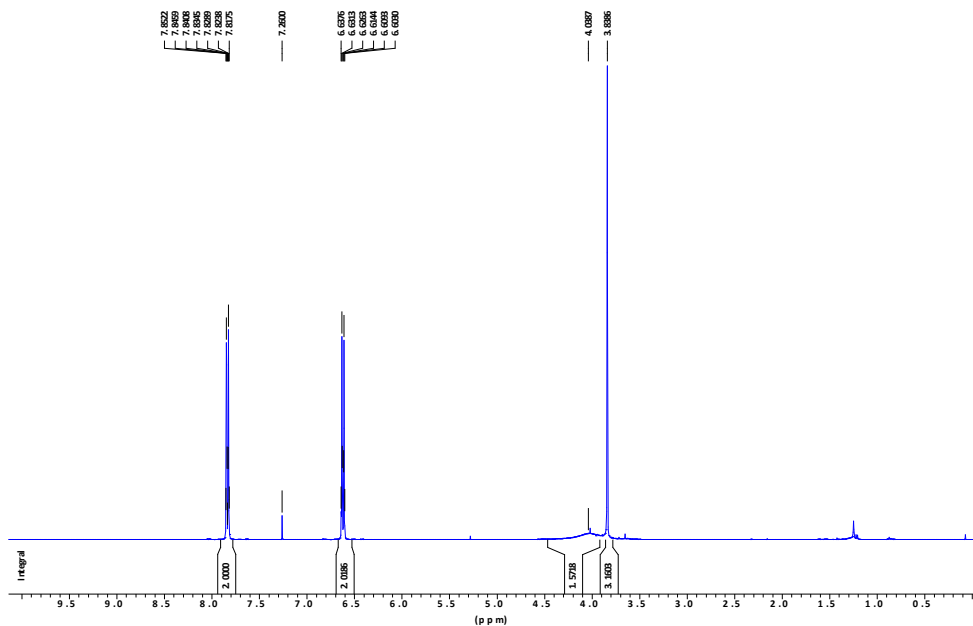

100 MHz, CDCl<sub>3</sub>

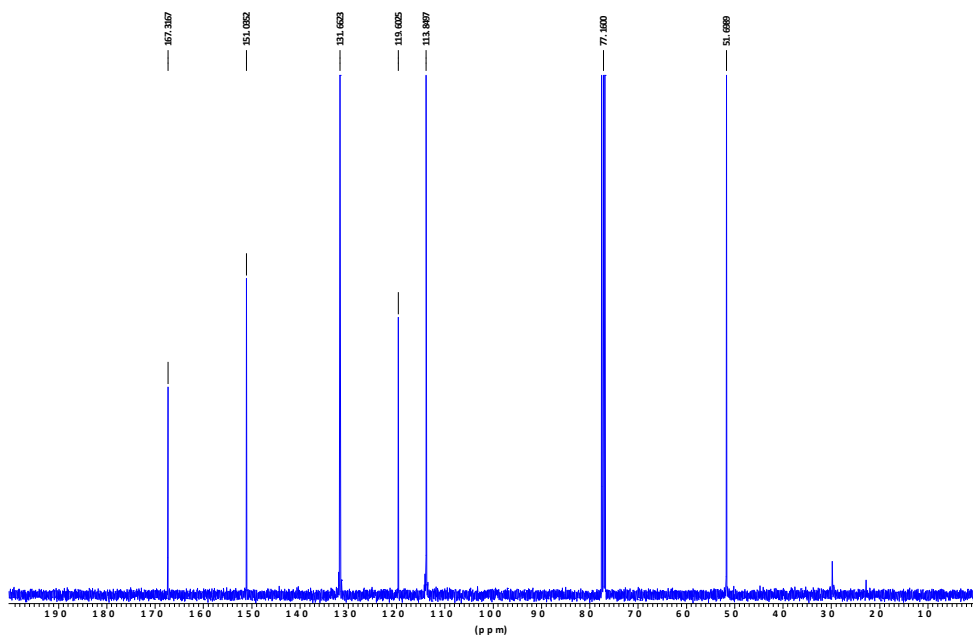

### Methyl 2-aminobenzoate [134-20-3] (18)

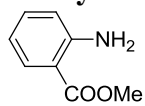

300 MHz, CDCl<sub>3</sub>

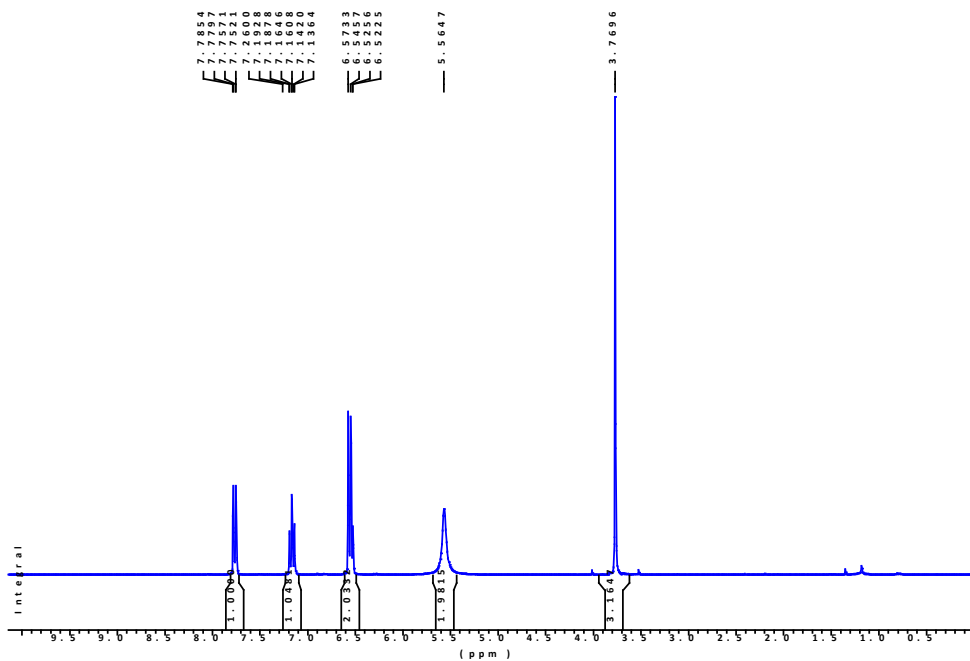

75 MHz, CDCl<sub>3</sub>

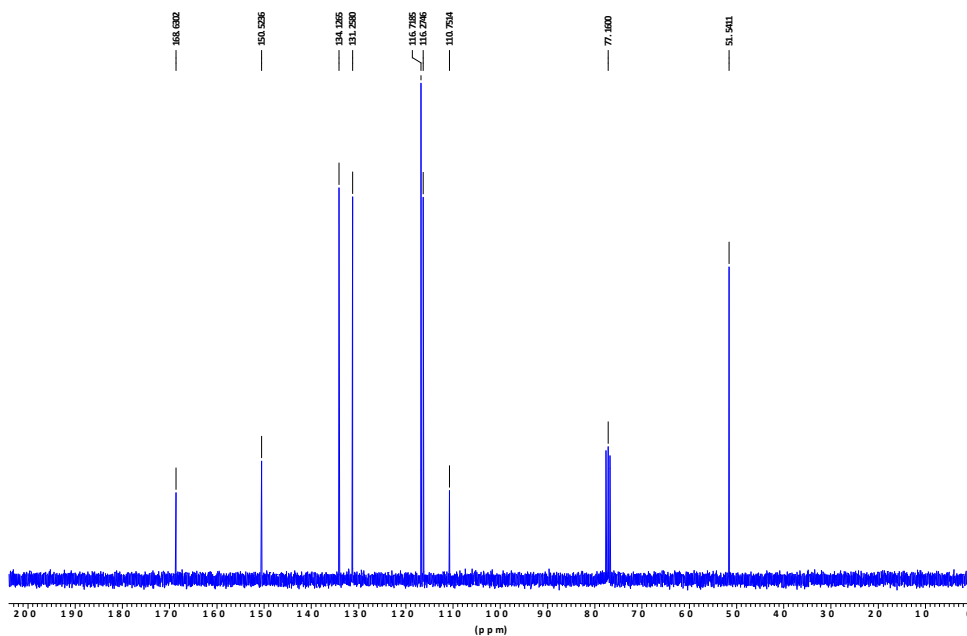

### Methyl 3-aminobenzoate [4518-10-9] (19)

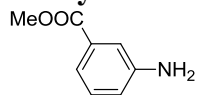

300 MHz, CDCl<sub>3</sub>

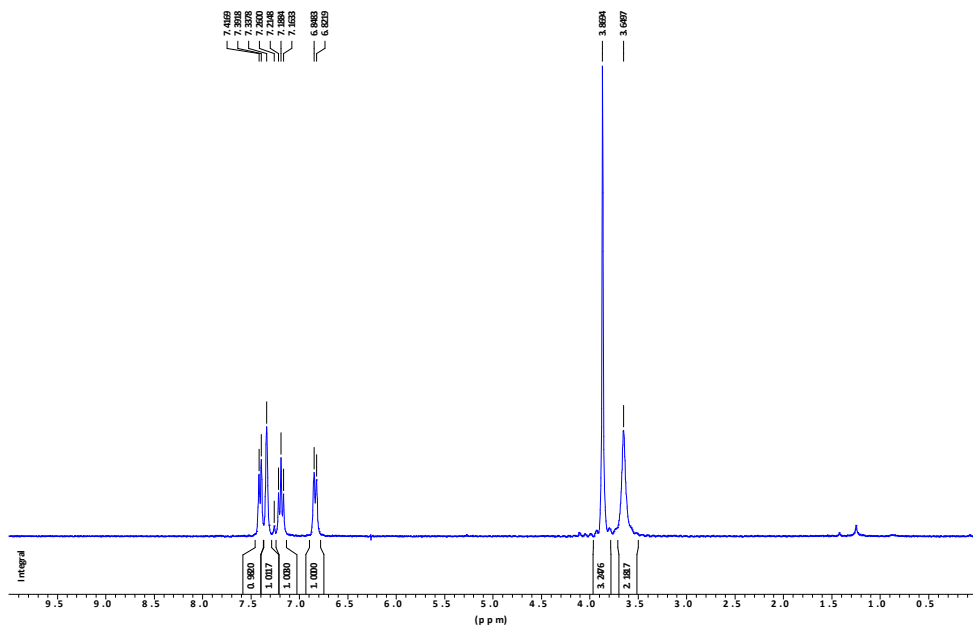

75 MHz, CDCl<sub>3</sub>

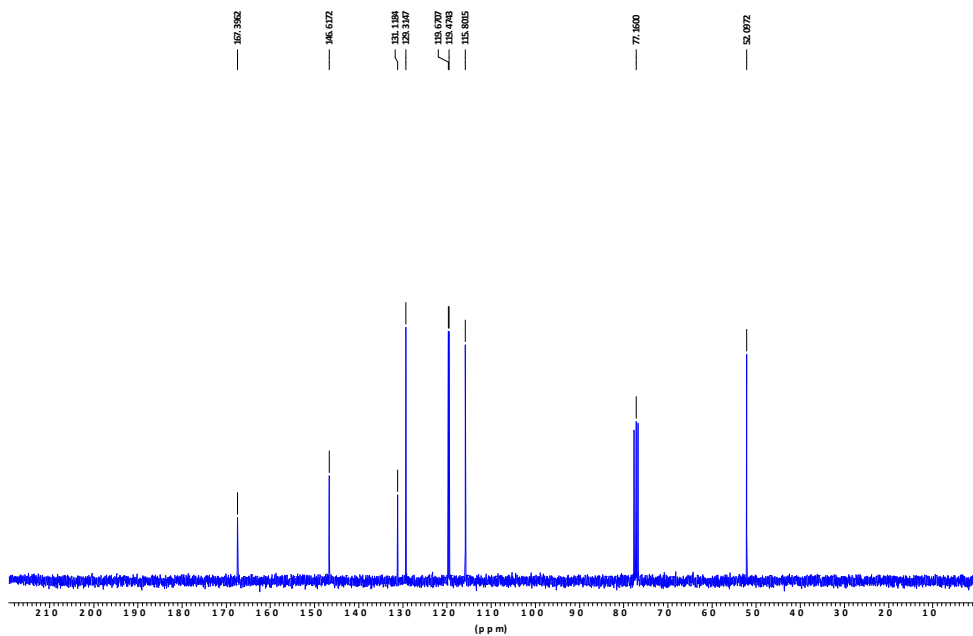

### 4-Aminophenol [123-30-8] (20)

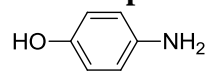

300 MHz, CDCl<sub>3</sub>

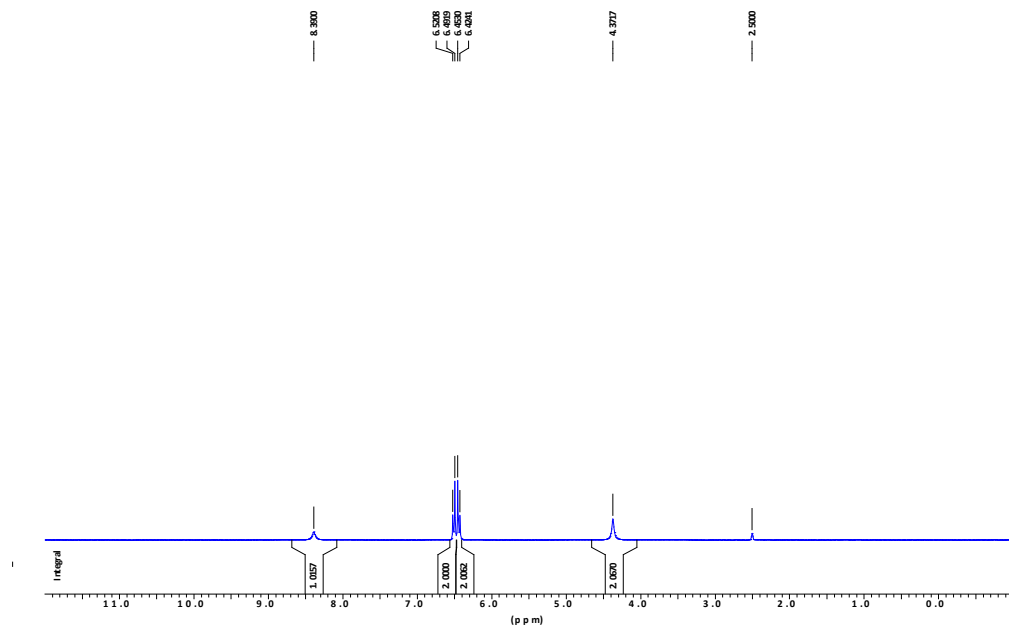

75 MHz, CDCl<sub>3</sub>

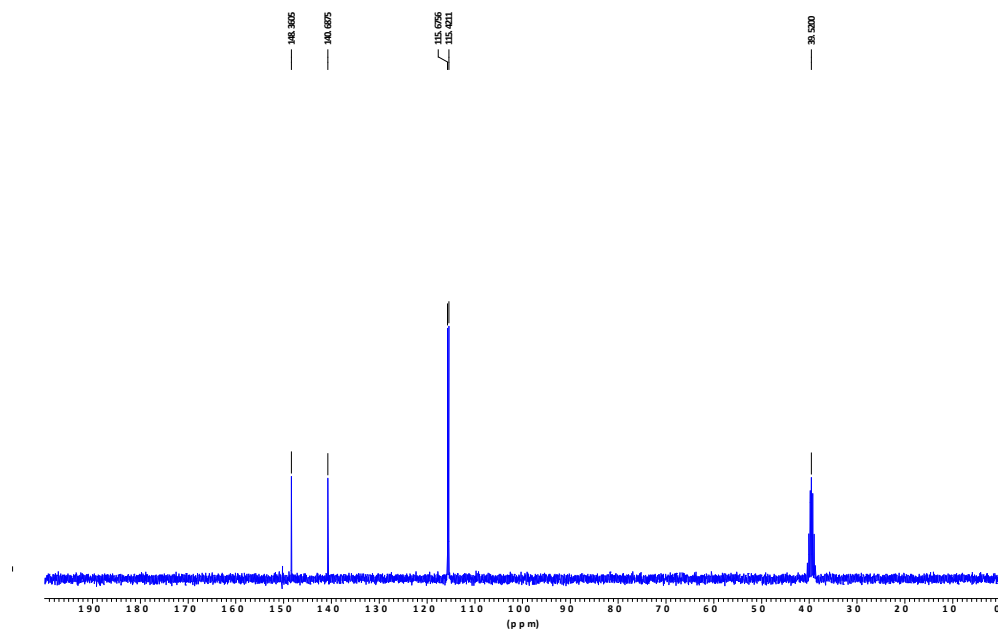

### 4-Methoxyaniline [104-94-9] (21)

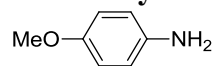

300 MHz, CDCl<sub>3</sub>

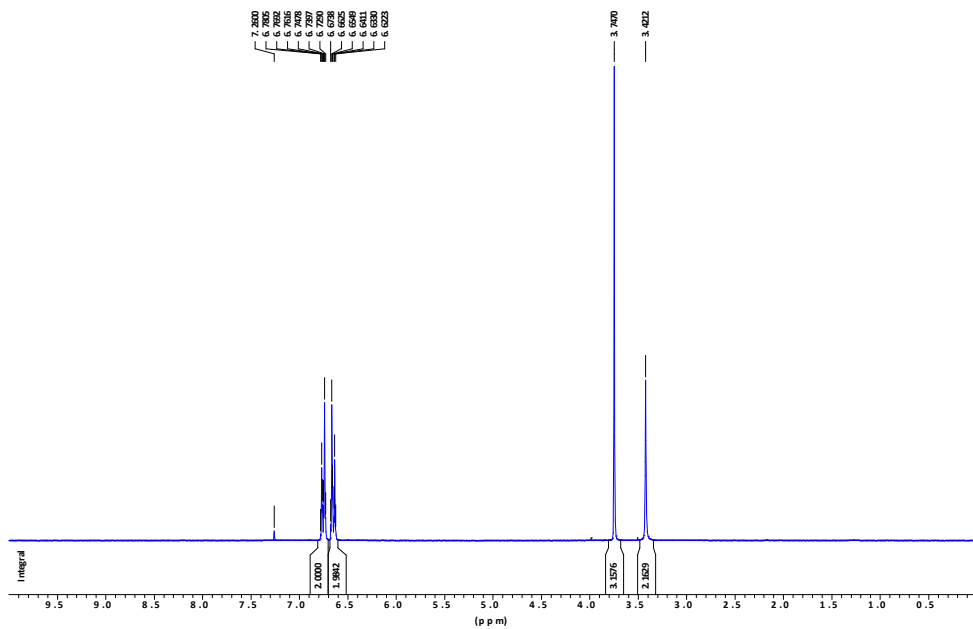

75 MHz, CDCl<sub>3</sub>

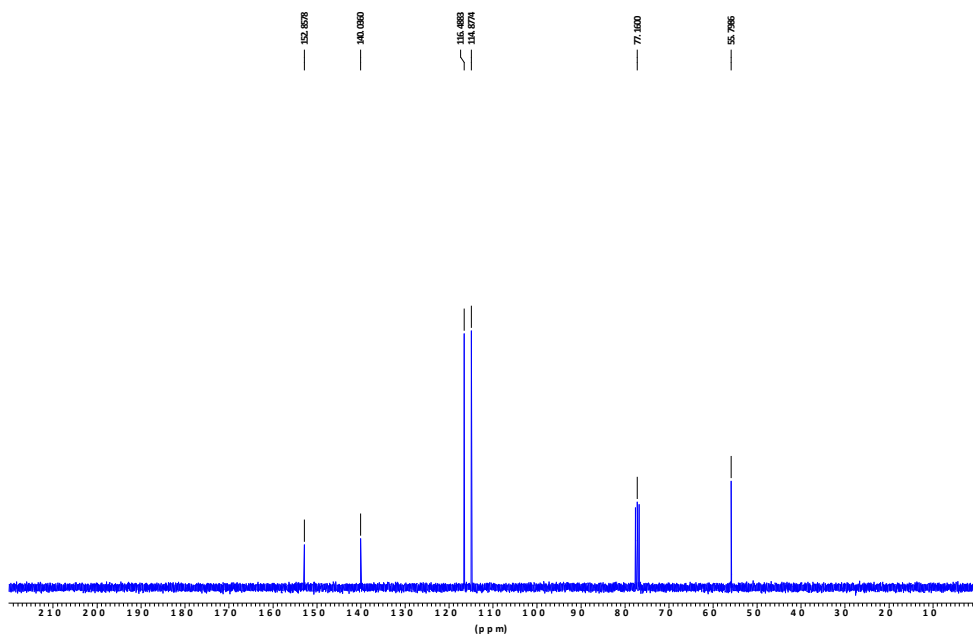

### 3-Aminopyridine [462-08-8] (22)

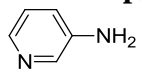

300 MHz, CDCl<sub>3</sub>

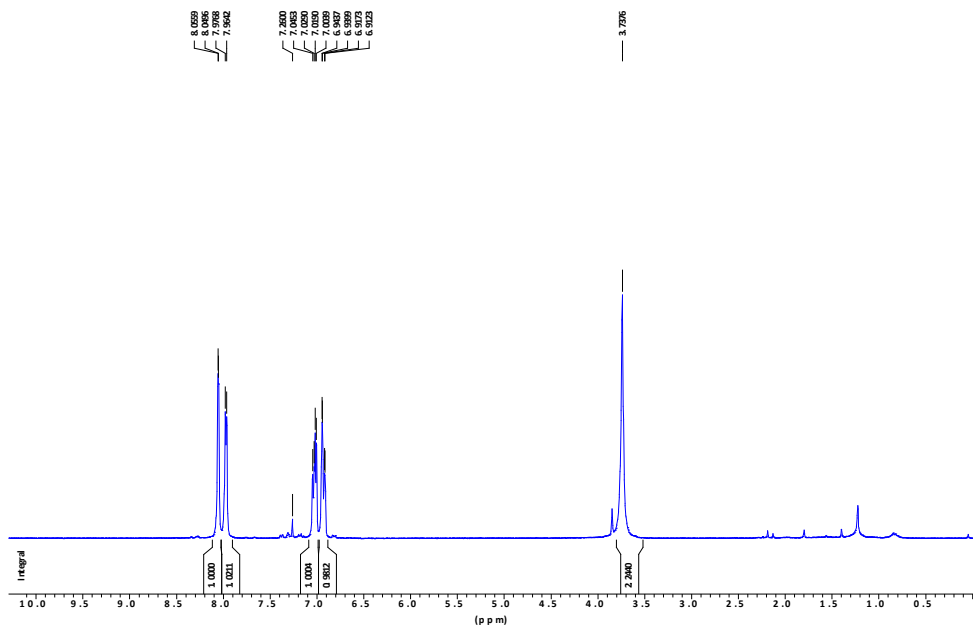

75 MHz, CDCl<sub>3</sub>

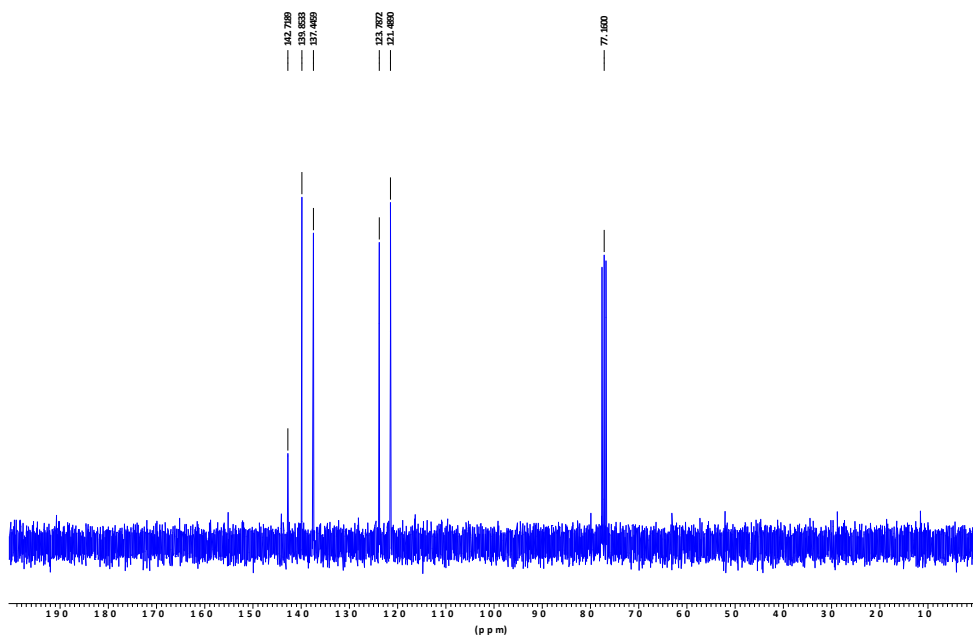

### 4-Fluoroaniline hydrochloride [2146-07-8] (23)

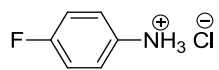

300 MHz, MeOD-*d*<sub>4</sub>+D<sub>2</sub>O

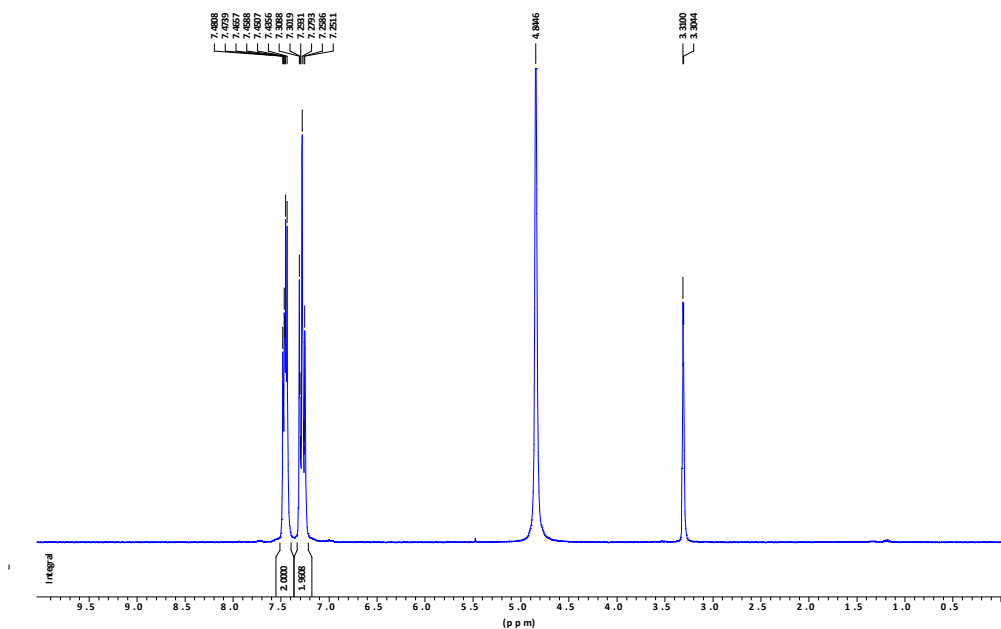

75 MHz, MeOD-*d*<sub>4</sub>+D<sub>2</sub>O

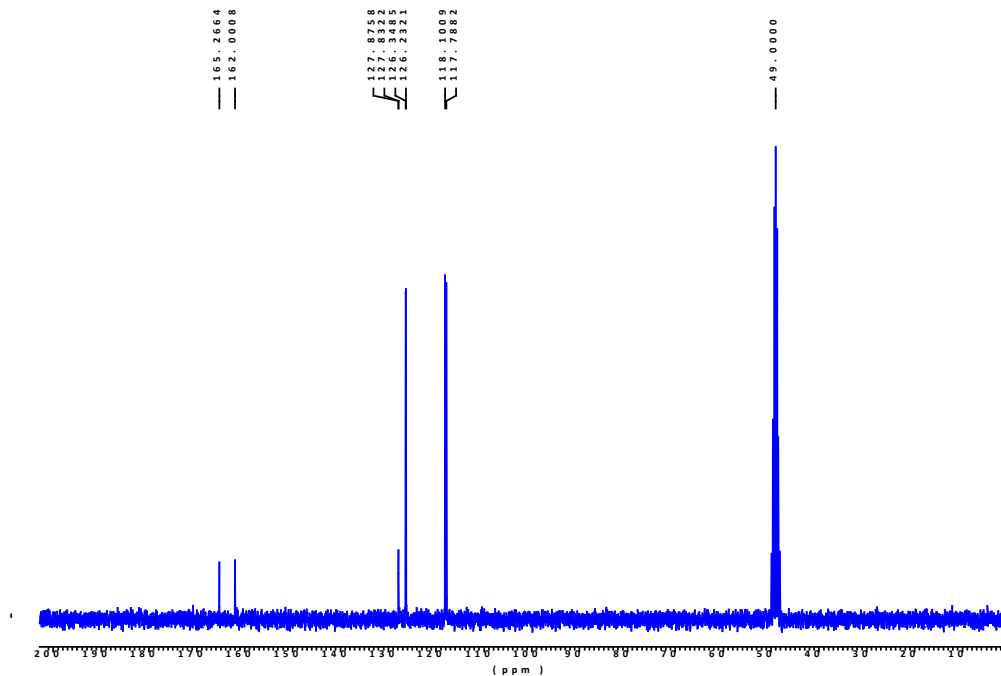





### 4-Bromoaniline [106-40-1] (25)

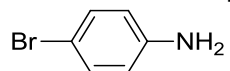

300 MHz, DMSO-*d*<sub>6</sub>

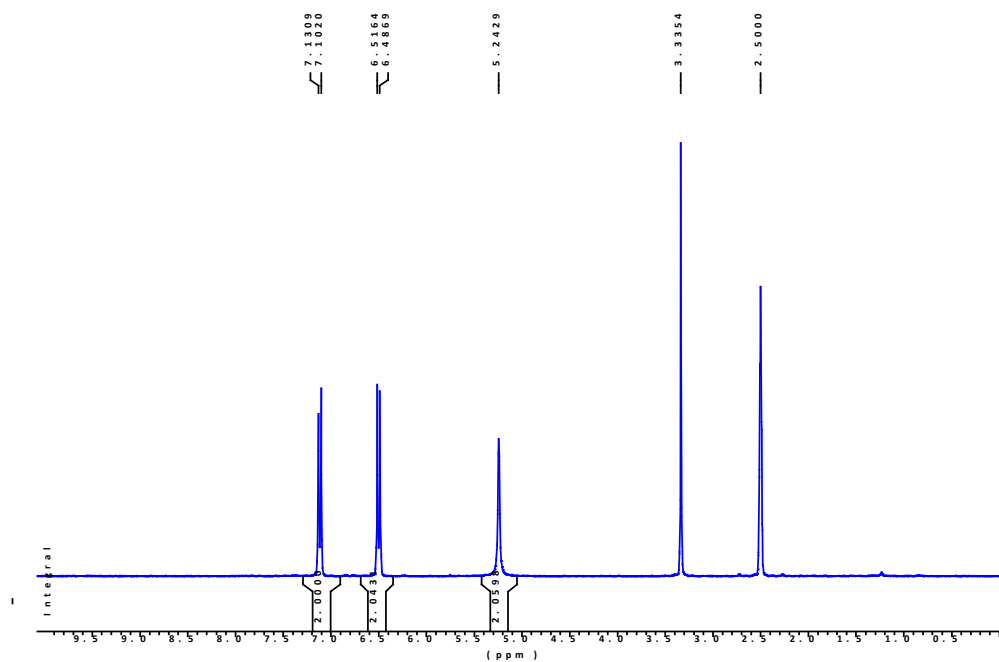

75 MHz, DMSO-*d*<sub>6</sub>

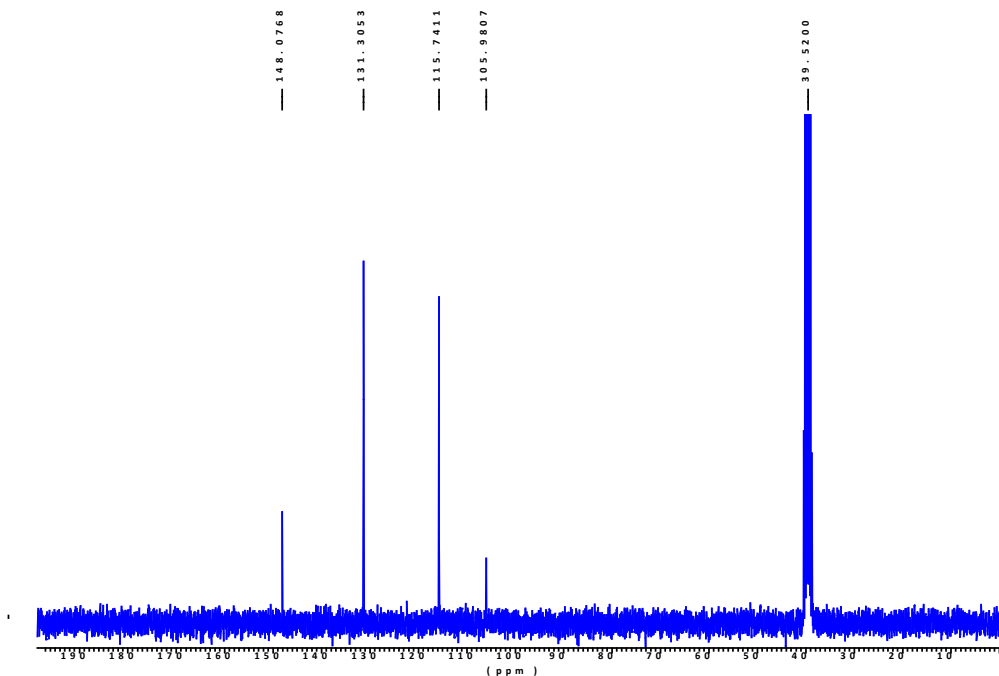

Supplement: c3gc37024k.pdf [file c3gc37024k.pdf]
